***Appraising causal relationships of dietary, nutritional and physical-activity exposures with overall and aggressive prostate cancer: two-sample Mendelian randomization study based on 79,148 prostate cancer cases and 61,106 controls***

Dr. Nabila Kazmi (PhD)<sup>1,2</sup>, Dr. Philip Haycock (PhD)<sup>1,2</sup>, Dr Konstantinos Tsilidis (PhD)<sup>3,4</sup>, Assoc Prof Brigid M. Lynch (PhD)<sup>5-7</sup>, Dr. Therese Truong (PhD)<sup>8</sup>, the PRACTICAL consortium, CRUK, BPC3, CAPS, PEGASUS\*, Prof Richard M Martin (PhD)<sup>1,2,9†</sup>, Dr. Sarah Lewis (PhD)<sup>1,2†</sup>

<sup>1</sup>MRC Integrative Epidemiology Unit (IEU), Bristol Medical School, University of Bristol, Bristol, UK

<sup>2</sup>Population Health Sciences, Bristol Medical School, University of Bristol, Bristol, UK

<sup>3</sup>Department of Hygiene and Epidemiology, University of Ioannina School of Medicine, Ioannina, Greece

<sup>4</sup>Department of Epidemiology and Biostatistics, School of Public Health, Imperial College London, London, UK

<sup>5</sup>Cancer Epidemiology Division, Cancer Council Victoria, Melbourne, Australia

<sup>6</sup>Centre for Epidemiology and Biostatistics, Melbourne School of Population and Global Health, University of Melbourne, Melbourne, Australia

<sup>7</sup>Physical-activity Laboratory, Baker Heart and Diabetes Institute, Melbourne, Australia

<sup>8</sup>Université Paris-Saclay, Université Paris-Sud, CESP (Center for Research in Epidemiology and Population Health), Inserm, Team Cancer and Environment, Villejuif, France.

<sup>9</sup>National Institute for Health Research (NIHR) Bristol Biomedical Research Centre, University Hospitals NHS Trust and University of Bristol, Bristol, UK.

\*Members from the PRACTICAL Consortium, CRUK, BPC3, CAPS and PEGASUS are provided in the supplement.

† These authors contributed equally

Corresponding author

**Contact details of the corresponding authors:**

Dr Sarah Lewis

Email: [s.j.lewis@bristol.ac.uk](mailto:s.j.lewis@bristol.ac.uk)

Telephone: +44 (0) 117 3313316

Address: Oakfield House, Oakfield Grove

University of Bristol

Bristol, BS8 2BN

UK

## Summary

**Background:** Prostate cancer is the second most common male cancer worldwide, but there is substantial geographical variation suggesting a potential role for modifiable risk factors in prostate carcinogenesis.

**Methods:** We identified previously reported prostate cancer risk factors from the World Cancer Research Fund's (WCRF) systematic appraisal of the global evidence (2018). We assessed whether each identified risk factor was causally associated with risk of overall (79,148 cases and 61,106 controls) or aggressive (15,167 cases and 58,308 controls) prostate cancer using Mendelian randomization (MR) based on genome wide association study (GWAS) summary statistics from the PRACTICAL and GAME-ON/ELLIPSE consortia. We assessed evidence for replication in UK Biobank (7,844 prostate cancer cases and 204,001 controls).

**Findings:** WCRF identified 57 potential risk factors, of which 22 could be instrumented for MR analyses using single nucleotide polymorphisms (SNPs). In MR analyses for overall prostate cancer, we identified evidence compatible with causality for the following risk factors (odds ratio [OR] per standard deviation increase; 95% confidence interval): accelerometer-measured physical-activity, OR=0.49 (0.33-0.72; p=0.0003); serum iron, OR=0.92 (0.86-0.98; p=0.007); body mass index (BMI), OR=0.90 (0.84-0.97; p=0.003); and mono-unsaturated fat, OR=1.11 (1.02-1.20; p=0.02). Findings in our replication analyses in UK Biobank were compatible with our main analyses (albeit with wide confidence intervals). In MR analysis, height was positively associated with aggressive prostate cancer risk: OR=1.07 (1.01-1.15; p=0.03).

**Interpretation:** The results for physical-activity, serum iron, BMI, mono-unsaturated fat and height are compatible with causality for prostate cancer but more research is needed to rule out violations of MR assumptions for some risk factors. The results suggest that interventions aimed at increasing physical activity may reduce prostate cancer risk, but the direction of effects of BMI, and iron are at odds with their effects on other diseases, so the overall public health impact of intervening on these need to be considered.

**Funding:** World Cancer Research Fund International (2015/1421), Cancer Research UK program grant (C18281/A19169), National Institute for Health Research, Bristol Biomedical Research Centre, and Victorian Cancer Agency (MCRF18005).

## 1 **Research in context**

### 2 **Evidence before this study**

3 The World Cancer Research Fund (WCRF) Continuous Update Project (CUP) has reported associations  
4 between diet, nutrition and physical activity, and prostate cancer using observational studies. Establishing  
5 causality is an important step in the development of prevention strategies but is challenging because inference  
6 from observational studies is limited by often intractable biases, including measurement error, reverse causation  
7 and residual, or unmeasured confounding.

### 8 **Added value of this study**

9 Mendelian randomization (MR) is a methodological approach to addressing measurement error, reverse  
10 causation and confounding within observational studies, based on ‘instrumental variable’ (IV) analysis. We  
11 systematically applied two-sample MR to appraise the evidence for a causal link between previously reported  
12 lifestyle and anthropometric risk factors (from WCRF report) with overall prostate cancer risk and aggressive  
13 prostate cancer risk.

### 14 **Implications of all the available evidence**

15 Our MR analyses showed that physical activity, BMI, and serum iron levels were inversely associated with  
16 overall prostate cancer risk and mono-unsaturated fat levels were positively associated and that these effects  
17 were likely to be causal. For these risk factors, the direction of association was consistent for aggressive prostate  
18 cancer risk. In addition, our MR analyses showed that height was positively associated with aggressive prostate  
19 cancer risk.

20

## 21 **Introduction**

22 In 2012, 1.1 million men were diagnosed with prostate cancer, making it the second most common male cancer  
23 worldwide<sup>1,2</sup>. There is wide global variation in prostate cancer incidence, with almost 70% of cases occurring in  
24 more developed regions of the world<sup>2</sup>. This variation is thought in part to be related to the intensity of prostate-  
25 specific antigen (PSA) based screening practices<sup>3,4</sup>, although migration studies suggest an influence of  
26 environmental and lifestyle factors<sup>5,6</sup>. Established risk factors include advanced age, ethnicity and family history  
27 of prostate cancer<sup>7,8</sup>. In addition, several lifestyle and anthropometric factors have been hypothesised to play an  
28 aetiological role, and measures of adiposity a prognostic role<sup>8</sup>. However, the epidemiological evidence to  
29 support a causal role for these potentially modifiable factors is weak. This is because inference from  
30 observational studies is limited by residual or unmeasured confounding, and other biases such as reverse  
31 causation and detection bias<sup>9,10</sup>.

32 Mendelian randomization (MR) is a methodological approach to addressing reverse causation and confounding  
33 within observational studies, based on long-established ‘instrumental variable’ (IV) principles<sup>11</sup>. MR exploits  
34 the random assortment of alleles through meiotic cell division at conception, and can be thought of as a natural  
35 experiment that generates conditions equivalent to randomised controlled trials, where randomised treatment  
36 arms are analogous to randomly assigned genetic subgroups<sup>12-15</sup>. At the population level, individuals defined by  
37 specific genotypes should on average only differ with respect to that genotype and its phenotypic consequences  
38 if certain IV assumptions are met. These assumptions are that the instrument is: i) robustly associated with the  
39 exposure it is acting as a proxy for; ii) independent of confounders; and iii) independent of the outcome  
40 conditional on the exposure (i.e. ‘no pleiotropy’ where a single locus influences the outcome through biological  
41 pathways that are independent of the exposure of interest)<sup>16</sup>. If these assumptions can be shown to have been  
42 met, then the genetic polymorphism can be used in an IV framework (i.e. MR) to provide an unconfounded and  
43 unbiased estimate of the causal association between the potentially modifiable risk factor and outcome of  
44 interest<sup>17</sup>. An extension of this methodology - two-sample MR - derives estimates for the required genotype-  
45 exposure and genotype-outcome associations from separate and non-overlapping samples of the same  
46 representative population<sup>13,18</sup>. Two-sample approaches exploit the rapidly growing availability of summary data  
47 from large consortia of genome-wide association studies (GWASs) and thus allow for greater sample sizes to  
48 improve statistical power<sup>19</sup>.

49 The aim of this study was to systematically apply two-sample MR analyses to appraise the evidence of a causal  
50 link between previously reported lifestyle and anthropometric risk factors with overall and aggressive prostate  
51 cancer.

52

## 53 **Methods**

### 54 **Selection of risk factors**

55 The World Cancer Research Fund (WCRF) Continuous Update Project (CUP) is a rigorous and systematic  
56 synthesis of the global scientific literature on diet, weight and physical-activity in relation to prostate cancer  
57 risk, based largely on observational epidemiological studies. We selected all potential risk factors for prostate  
58 cancer identified by the WCRF CUP reported in 2018<sup>8</sup>.

59

## 59 Defining genetic instruments

60 We searched for each of the risk factors included in the WCRF report, using exact wording and synonyms, in  
61 both the GWAS catalog ([www.ebi.ac.uk/gwas](http://www.ebi.ac.uk/gwas)) and the MR-Base repository of full GWAS association statistics  
62 ([www.mrbase.org](http://www.mrbase.org))<sup>20</sup>. This was done to identify any studies that reported associations between single nucleotide  
63 polymorphisms (SNPs) and the specific risk factor of interest<sup>20</sup>. Further details of how we defined the genetic  
64 instruments and their properties are provided in the supplemental material, including; selection criteria for the  
65 SNP(s) to proxy each risk factor, how we standardised the beta coefficient and standard error (SE) for each  
66 SNP-exposure association, and how we calculated the proportion of variance ( $R^2$ ) in the risk factor explained by  
67 the SNP(s), the strength of the instrument represented by the F-statistic, and the power to detect an odds ratio  
68 (OR) of 1.2 (or conversely a protective OR of 0.80).

## 69 Outcome trait

70 GWAS results for prostate cancer were obtained from fixed-effects meta-analyses based on individuals of  
71 European ancestry in the PRACTICAL and GAME-ON/ELLIPSE consortia (PRACTICAL: Prostate Cancer  
72 Association Group to Investigate Cancer-Associated Alterations in the Genome; GAME-ON: Genetic  
73 Associations and Mechanisms in Oncology; ELLIPSE: Elucidating Loci Involved in Prostate Cancer  
74 Susceptibility). The summary data were derived from a GWAS of overall prostate cancer on 79,148 cases and  
75 61,106 controls<sup>21</sup>, and a GWAS of aggressive prostate cancer involving 15,167 cases and 58,308 controls<sup>21</sup>.  
76 Aggressive prostate cancer was defined as Gleason score  $\geq 8$ , PSA  $>100$  ng/mL, metastatic disease (M1), or  
77 death from prostate cancer.

## 78 Two-sample MR analysis

79 We used the inverse-variance weighted (IVW) method as our primary MR analytical approach. The IVW  
80 method estimates the effect of the exposure on the outcome from the slope of the relationship between  $\beta_{XG}$   
81 (SNP-exposure association) and  $\beta_{YG}$  (SNP-outcome association). This approach performs an inverse variance  
82 weighted meta-analysis of each Wald ratio<sup>22</sup>, effectively treating each SNP instrumenting a specific risk-factor  
83 as a valid natural experiment. We used a random effects IVW model by default, unless there was  
84 underdispersion in the causal estimates between SNPs, in which case a fixed effects model was used. The  
85 estimates from the random and fixed effects IVW models are the same but the variance for the random effects  
86 model is inflated to take into account heterogeneity between SNPs. For risk-factors that only had one SNP  
87 available as the instrument, we used the Wald ratio, which is equivalent to  $\beta_{YG}/\beta_{XG}$  (where Y= outcome, G=  
88 gene and X=exposure).

89 In sensitivity analyses, we applied weighted median<sup>23</sup>, weighted mode<sup>24</sup> and MR-Egger regression<sup>25</sup> methods.  
90 The weighted median has the advantage that only half the SNPs need to be valid instruments (i.e. exhibiting no  
91 horizontal pleiotropy, no association with confounders, and a robust association with the exposure) for the  
92 causal effect estimate to be unbiased. The mode-based estimator clusters the SNPs into groups based on  
93 similarity of causal effects, and returns the causal effect estimate based on the cluster that has the largest number  
94 of SNPs. The weighted mode introduces an extra element similar to IVW and the weighted median, weighting  
95 each SNP's contribution to the clustering by the inverse variance of its outcome effect.

96 The MR-Egger method is similar to the IVW approach but relaxes the 'no horizontal pleiotropy' assumption.  
97 MR-Egger regression allows a non-zero intercept in the relationship between multiple SNP-outcome and SNP-  
98 exposure associations, where the intercept provides a formal statistical test for the presence of directional (bias  
99 inducing) pleiotropy. The slope of the MR-Egger regression between multiple SNP-outcome and SNP-exposure  
100 associations can be considered as an unbiased causal effect between the risk factors and prostate cancer,  
101 assuming any horizontal pleiotropic effects are not correlated with the SNP-exposure effects (strength of the  
102 instrument). The MR pleiotropy residual sum and outlier test (MR-PRESSO) was also implemented to identify  
103 outlying genetic variants and analyses were re-run after excluding these variants<sup>26</sup>. Violations of the MR 'no  
104 horizontal pleiotropy' assumption were also assessed by visual inspection of funnel<sup>27</sup>, forest, scatter and leave-  
105 one-out plots, and tests of heterogeneity<sup>28</sup> between SNPs making up a multi-allelic instrument<sup>20</sup>.

106 All analyses were conducted using the TwoSampleMR and MRInstruments R packages, curated by MR-Base,  
107 [www.mrbase.org](http://www.mrbase.org).

## 108 Replication

109 The risk factors that showed suggestive evidence of association ( $p < 0.05$ ) with overall prostate cancer were  
110 assessed for replication among men in the UK Biobank prospective cohort of 7,844 prostate cancer cases and  
111 204,001 controls, using two sample MR. The information on prostate cancer diagnosis was obtained from  
112 National Cancer Registries, UK (<http://biobank.ndph.ox.ac.uk/showcase/field.cgi?id=40006>), based on ICD10  
113 code for prostate cancer C61. The GWAS results of this study are available on [www.mrbase.org](http://www.mrbase.org).

114

## 115 **Results**

116 There were 57 potential risk factors for prostate cancer considered by the WCRF 2018 report<sup>8</sup>(Supplementary  
117 File 1; Table S1 and Table S2). The WCRF reported strong evidence that being obese (BMI, waist  
118 circumference and WHR) increases the risk of aggressive prostate cancer (Supplementary File 1; Table S2) and  
119 height increases the risk of prostate cancer (Supplementary File 1; Table S1 and S2). There was limited  
120 evidence that consumption of dairy products, diets high in calcium, and low plasma alpha-tocopherol and low  
121 plasm selenium concentrations increased prostate cancer risk. The evidence was too weak to draw any  
122 conclusions for the remaining risk factors. Of these 57 exposures, 22 could be analysed using MR because they  
123 had at least one SNP that was strongly associated with them (Table 1).

## 124 **Mendelian randomization results**

125 Of the 22 potential risk factors examined in our study, only four showed evidence of an association with overall  
126 prostate cancer risk (Figure 1, Supplementary File 1; Table S3). Physical-activity, assessed as ‘average  
127 acceleration’ (OR per SD change: 0.49; 95% CI: 0.33, 0.72;  $P=0.0003$ ), serum iron levels (OR: 0.92; 95% CI:  
128 0.86, 0.98;  $P=0.007$ ), and BMI (OR: 0.90; 95% CI: 0.84, 0.97;  $P=0.003$ ) were inversely associated with overall  
129 prostate cancer risk. Circulating mono-unsaturated fat (OR: 1.11; 95% CI: 1.02, 1.20;  $P=0.02$ ) was positively  
130 associated with overall prostate cancer risk. Compared to results from observational studies<sup>8</sup> for overall prostate  
131 cancer risk (highest versus lowest total physical-activity; risk ratio (RR): 0.97; 95% CI: 0.9, 1.04), the estimate  
132 obtained by MR for the physical-activity measure (average acceleration) was much more strongly supportive of  
133 a protective effective (Figure 1). The WCRF reported strong evidence of association for increased body fatness  
134 (marked by BMI (RR: 1.08; 95% CI: 1.04, 1.12), waist circumference (RR: 1.12; 95% CI: 1.04, 1.21) and WHR  
135 (RR: 1.15; 95% CI: 1.03, 1.28)) with aggressive prostate cancer risk but these results were inconsistent with our  
136 MR results, which found evidence of protective association of BMI with overall prostate cancer risk. In the  
137 WCRF report (2018), the observational analysis reported no association between intake of mono-unsaturated fat  
138 and overall prostate cancer risk (RR: 1.00; 95% CI: 0.99, 1.01) but our MR-analysis found a positive association  
139 between circulating mono-unsaturated fat and overall prostate cancer risk.

140 None of the risk factors we examined showed strong evidence of association with aggressive prostate cancer  
141 although height showed weak evidence of increasing risk; OR: 1.07; 95% CI: 1.01, 1.15;  $P=0.03$  (Figure 2,  
142 Supplementary File 1; Table S4).The observational studies also reported positive association of height with  
143 overall prostate cancer (OR: 1.04.; 95% CI: 1.03, 1.05;  $P=1.3\times 10^{-15}$ ) and aggressive prostate cancer<sup>8</sup> (OR: 1.04;  
144 95% CI: 1.02, 1.06;  $P=6.4\times 10^{-5}$ ). However, our MR analysis did not find evidence of association between height  
145 and overall prostate cancer risk. There was weak evidence for iron, and average acceleration, with effect-  
146 estimates being similar to those observed for overall prostate cancers. In the WCRF report, observational studies  
147 have reported positive effects of dairy products, calcium and low selenium concentration on overall prostate  
148 cancer, but we did not find strong evidence of associations with these in our MR analyses (Figure 1). However,  
149 the confidence intervals (CIs) for these risk factors were overlapping between observational and MR analyses.  
150 The power to detect the observationally reported effect size for these risk factors was >74%). Low alpha-  
151 tocopherol concentration was positively associated with prostate cancer risk in WCRF report but due to lack of  
152 an instrument it was not possible to conduct MR analyses.

153 There were only two SNPs available for the MR analysis of physical-activity (average acceleration) so we could  
154 not perform extensive sensitivity analyses. The direction of association for both SNPs was consistent  
155 (Supplementary File 1; Table S5) and the p-value for heterogeneity test was 0.99. These SNPs were on different  
156 chromosomes so represent independent associations. After exploring MRBASE-PheWAS  
157 (<http://phewas.mrbase.org/>), we found that these two SNPs were associated with anthropometric traits other than  
158 physical activity (Supplementary File 1; Table S6). The results for the effect of serum iron, and increasing BMI  
159 on overall prostate cancer were consistent across the various sensitivity analyses (Supplementary File 1; Figure  
160 S1-S3). The test for directional horizontal pleiotropy by MR-Egger (serum iron: intercept: 0.0005,  $P=0.97$  and  
161 BMI: intercept: -0.0002,  $P=0.89$ ) didn't find evidence of pleiotropy. Mono-unsaturated fat showed results in the  
162 opposite direction using MR-Egger regression (OR: 0.85; 95% CI: 0.55, 1.31;  $P=0.51$ ) compared to other MR-  
163 methods (Supplementary File 1; Figure S1 and S4). However, there was no strong evidence for directional  
164 pleiotropy for mono-unsaturated fat using MR-Egger (test for directional horizontal pleiotropy by MR-Egger:  
165 intercept: 0.04,  $P=0.31$ ). The MR-Egger tests for both iron and mono-unsaturated fat had low power due to the  
166 small number of SNPs used, however all 5 SNPs for iron and 4/5 SNPs for mono-unsaturated fats showed  
167 associations with prostate cancer in the same direction (Supplementary File 1; Table S7-S8). At MRBASE-  
168 PheWAS, five SNPs of iron were associated with haemoglobin concentration and blood cells count  
169 (Supplementary File 1; Table S9) and SNPs of mono-unsaturated fat were associated with lipids (Supplementary  
170 File 1; Table S10). The MR results for single SNP analyses of BMI (overall prostate cancer) and height  
171 (aggressive prostate cancer) are provided in Supplementary File 1; Table S11-S12.



## 172 **Replication**

173 The MR analyses were repeated using prostate cancer summary data generated from UK Biobank for physical-  
174 activity, iron, BMI, and mono-unsaturated fat (Figure 3). The point-estimates showed consistent directions of  
175 association for physical-activity (OR: 0.37; 95% CI: 0.13, 1.06; P=0.07), and BMI (OR: 0.83, 95% CI: 0.74,  
176 0.94; P=0.002). The point-estimates for iron (OR: 1.07; 95% CI: 0.96, 1.20; P=0.24) and mono-unsaturated fat  
177 (OR: 0.89; 95% CI: 0.73, 1.07; P=0.20) were in the opposite direction, but the power to detect an effect with  
178 these risk factors in UK Biobank was low and confidence intervals for the replication analysis overlapped with  
179 our main analysis for all risk factors.  
180

## 181 **Discussion**

182 We found consistent evidence that physical-activity (assessed as ‘average accelerations’, but not other measures  
183 of physical activity), and BMI have an inverse effect on overall prostate cancer risk. There was also evidence of  
184 an inverse effect of iron and a positive effect of circulating mono-unsaturated fat in our initial analyses, the  
185 effect sizes were in opposite direction in UK Biobank study however power for the replication analysis was low  
186 and their CIs overlapped with the PRACTICAL study. There was weak evidence for physical-activity (average  
187 accelerations), and iron had a similar effect on aggressive prostate cancer to that seen for overall prostate cancer.  
188 We found little evidence that any of the other risk factors studied have a causal role in overall or aggressive  
189 prostate cancer, but height showed a positive association with aggressive prostate cancer. The CIs of MR results  
190 overlapped with those seen in the observational analyses for all risk factors except for average acceleration and  
191 mono-unsaturated fat (overall prostate cancer). In fact, confidence intervals for our MR analysis of aggressive  
192 prostate cancer were wide and the power for these analyses was low for many risk factors.

193 The WCRF report meta-analysed self-reported physical-activity which was assessed in different studies by  
194 various methods (i.e. occupational, recreational and total physical-activity) as highest versus lowest level of total  
195 physical-activity, a relatively crude dichotomy that may have masked associations. Our MR analysis which  
196 proxied fraction accelerations was the most similar to the observational analyses and we did not find evidence of  
197 an association of this measure with prostate cancer. However, we did find an association with average  
198 acceleration, which is a different measure and could be high if someone is consistently engaging in light-  
199 intensity activity across most of the waking day (vs lots of sitting and a 30 minutes bout of MVPA). Indeed,  
200 there is little genetic or phenotypic correlation between the two measures in the UKBiobank population<sup>29</sup>. The  
201 mechanism for our association between average accelerations and prostate cancer is unclear, although this could  
202 be through improved insulin sensitivity or reduced insulin-like growth factor-1 (IGF-1)<sup>30</sup>, reduced levels of  
203 testosterone and dihydrotestosterone<sup>31</sup>, alterations in the antioxidant defence system<sup>31</sup>, or improvements in the  
204 immune system through enhanced natural killer cell activity<sup>31</sup>.

205 Whilst not consistent with observational analyses, our results for BMI are concordant with other lines of  
206 evidence. We have previously shown weak evidence that higher BMI is associated with a reduced prostate  
207 cancer risk, in a smaller sample from the PRACTICAL consortium<sup>32</sup>. A study examined childhood and adult  
208 body size in relation to total incident prostate cancer in a prospective cohort of 47,491 US men<sup>33</sup>. High BMI at  
209 age 21 was inversely associated with total prostate cancer, with fatal and advanced disease. The association for  
210 late adult BMI was more complex and differed by age this could represent confounding by other factors for  
211 example physical activity, and diet etc.

212 Despite showing a protective effect of BMI on prostate cancer risk, we did not find any strong evidence of waist  
213 circumference or WHR with risk. However, the results for all these risk factors were in the same direction. The  
214 point estimates for BMI, waist circumference and WHR were in the opposite direction to findings from  
215 observational results for aggressive prostate cancer. For aggressive prostate cancer, power calculations  
216 suggested that we would have good power to detect an effect of BMI (96%) but very low power (33% and 23%)  
217 to detect an OR of 1.20 (or, conversely a protective OR of at least 0.80) for waist circumference and WHR  
218 respectively. An increased estrogen production has been observed in obese men<sup>34</sup>. The sensitivity of prostate  
219 cancer to sex hormones has been exploited for therapeutic purposes for many years. Androgen-deprivation  
220 therapy is a common treatment in prostate cancer<sup>35</sup>, as is the therapeutic use of estrogen for patients with  
221 metastatic prostate cancer in both the US<sup>36</sup> and Europe<sup>37</sup>, though not popular due to cardiovascular and other  
222 side effects. Hence the clinical prediction would be that obesity would be associated with a lower risk of  
223 prostate cancer. However, we cannot rule out detection bias<sup>38</sup> arising from delayed diagnosis and therefore a  
224 more advanced stage at diagnosis in obese men. This could arise due to lower accuracy of digital rectal  
225 examination in obese men or lower PSA values caused by obesity-related traits.

226 The analysis of iron as a risk factor for prostate cancer found that the evidence was too limited to draw  
227 conclusions in the WCRF Second Expert Report and this was not updated in the Third Expert Report due to a  
228 lack of new evidence<sup>8,39</sup>. Population studies that have examined the associations between serum iron and cancer  
229 outcomes are limited and have reported discordant findings. A prospective cohort study with 15-16 years follow  
230 up time reported higher serum iron concentrations increased non-skin cancer risk overall but conversely, in men,

231 higher serum iron concentrations decreased the risk of non-skin cancer<sup>40</sup>. A Swedish cohort reported increased  
232 serum iron concentrations were not associated with overall cancer risk except for a slightly higher risk of  
233 postmenopausal breast cancer<sup>41</sup>. Previous findings have suggested that, although higher circulating iron  
234 concentrations may potentially increase the risk of cancer in women it may be protective against cancer in men<sup>40</sup>  
235 which is in accordance with our MR findings. Although again we were unable to replicate these findings in UK  
236 Biobank due to low power.

237 Our MR-analysis investigated the association of circulating levels of mono-unsaturated fat on prostate cancer,  
238 circulating levels of this nutrient have been shown to be poorly correlated with mono-unsaturated fat intake  
239 measured by questionnaire<sup>42</sup>. The inclusion of an objective measure in our MR-analysis versus questionnaire  
240 data in observational studies could be the reason for the discordant results. Although discordance could also be  
241 due to negative confounding in the former studies resulting in the effect estimate being closer to the null (e.g.,  
242 through other dietary, lifestyle, or molecular factors. Instruments for mono-unsaturated fat are correlated with  
243 instruments for saturated fat and other lipids. It could be possible that saturated fat or other lipids cause prostate  
244 cancer and this result might reflect that. More research is needed into the independence of mono-unsaturated fat  
245 of other lipid factors.

246 Our MR results showed positive association between height and aggressive prostate cancer and the results was  
247 consistent with observational studies. Adult height is associated with the rate of growth during fetal life and  
248 childhood<sup>43,44</sup>. Health and nutrition status in the neonatal period and childhood may affect the age of sexual  
249 maturity. These processes are mediated by changes in the hormonal microenvironment that may have both short  
250 and long term effects on circulating levels of growth factors, insulin and other endocrine or tissue specific  
251 mediators that may impact cancer risk<sup>45</sup>.

252 The results from replication analyses were compatible with the main findings for BMI, and physical activity  
253 (albeit with wide confidence intervals for physical activity), which increases the likelihood that these findings  
254 are real. The UK Biobank sample size was however, smaller, and the effects were estimated with less precision  
255 and whilst the results for iron and mono-unsaturated fats did not appear to replicate, due to low power in the  
256 replication study we cannot rule out causal effects of these nutrients.

257 This study's major strength is the use of MR, which is less susceptible to problems of measurement error,  
258 confounding and reverse causation in comparison to conventional observational studies. The use of two-sample  
259 MR enabled the use of the largest GWAS of prostate cancer<sup>21</sup> to date. We were also able to make use of the  
260 largest GWASs on the risk factors of interest, to increase the precision of the SNP-exposure estimates, which  
261 should reduce impact of weak instruments bias, which in turn increase statistical power assuming the SNP-  
262 exposure estimates are unbiased and risk factor/outcome samples come from the same population.

263 The study also has some limitations. We had only two SNPs for physical-activity assessed as average  
264 acceleration. If there were many independent SNPs available the causal inference could have been strengthened  
265 because a) each variant represents an independent natural experiment, and a more precise overall causal estimate  
266 (i.e. tighter CIs) can be obtained by meta-analysing the single estimates from each instrument; and b) potential  
267 bias arising from the violation of the assumptions can be detected or corrected by evaluating the consistency of  
268 effects across instruments<sup>16,24,28,46,47</sup>. For many of the risk factors reported in the WCRF 2018 report, for  
269 example alpha-tocopherol, vitamin A, vitamin C etc, we did not find genetic instruments to conduct MR  
270 analyses. For the majority of the risk factors in overall prostate cancer, MR analyses were sufficiently powered  
271 to detect effect sizes of a modest magnitude (OR of 1.20 or 0.80) except for physical-activity traits (overall  
272 acceleration average, fraction of accelerations >425 milli-gravities, and sedentary behaviour), thus failure to  
273 detect strong evidence of effects for these risk factors could be due to low power to detect smaller effect sizes.  
274 Further identification of independent genetic variants that influence these risk factors will help to improve  
275 statistical power for future analyses.

276 In conclusion, we found evidence that physical-activity, serum iron, and BMI may be causally and inversely  
277 related to and circulating mono-unsaturated fat and height may be causally and positively related to, prostate  
278 cancer risk. Further studies should investigate the mechanisms by which these factors may lead to prostate  
279 cancer and investigate the potential to intervene to reduce risk.

## 280 **Contributors**

281 SL, RMM and NK conceived and designed the study. NK conducted the analyses. NK wrote the manuscript  
282 with input from all authors. Correspondence and material requests should be addressed to SL  
283 ([s.j.lewis@bristol.ac.uk](mailto:s.j.lewis@bristol.ac.uk)).

284  
285 **Declaration of interests**  
286 None

287  
288

289

290 **Acknowledgments**

291 This research was funded by a grant awarded to SL for 3 years to identify modifiable risk factors for prostate cancer, by the World Cancer Research Fund International (Grant Reference Number: 2015/1421), a Cancer  
 292 Research UK program grant (C18281/A19169) and the National Institute for Health Research (NIHR) Bristol  
 293 Biomedical Research Centre. Dr Haycock is supported by CRUK Population Research Postdoctoral Fellowship  
 294 C52724/A20138. The views expressed are those of the author(s) and not necessarily those of the NIHR or the  
 295 Department of Health and Social Care. Lynch was supported by a Mid-Career Research Fellowship from the  
 296 Victorian Cancer Agency (MCRF18005).  
 297  
 298

**Figure 1. Comparison between observational and MR estimates for the risk factors and overall prostate cancer risk**

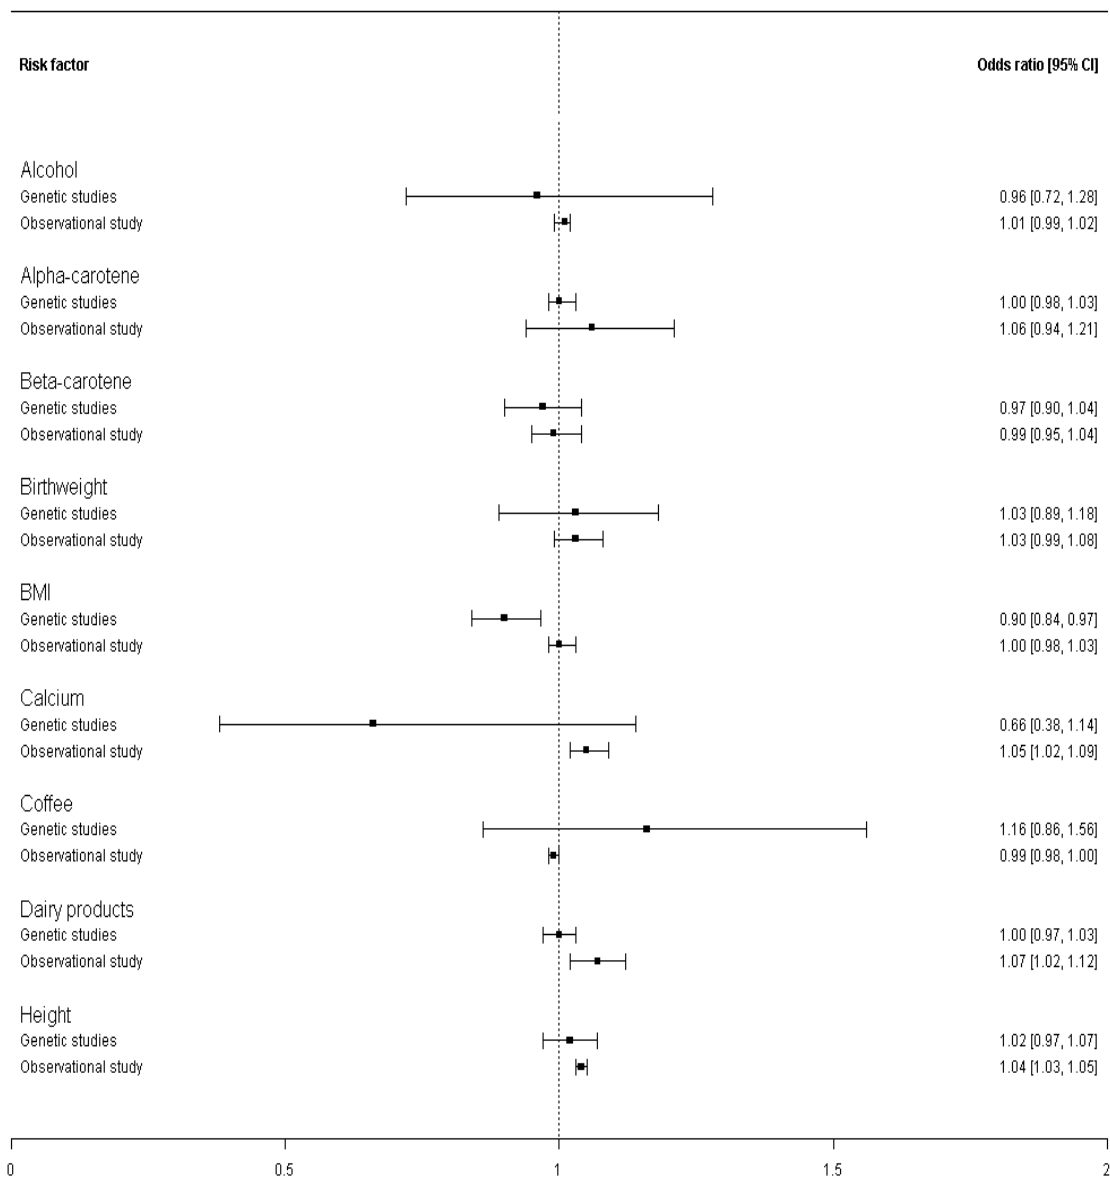

299



300

301

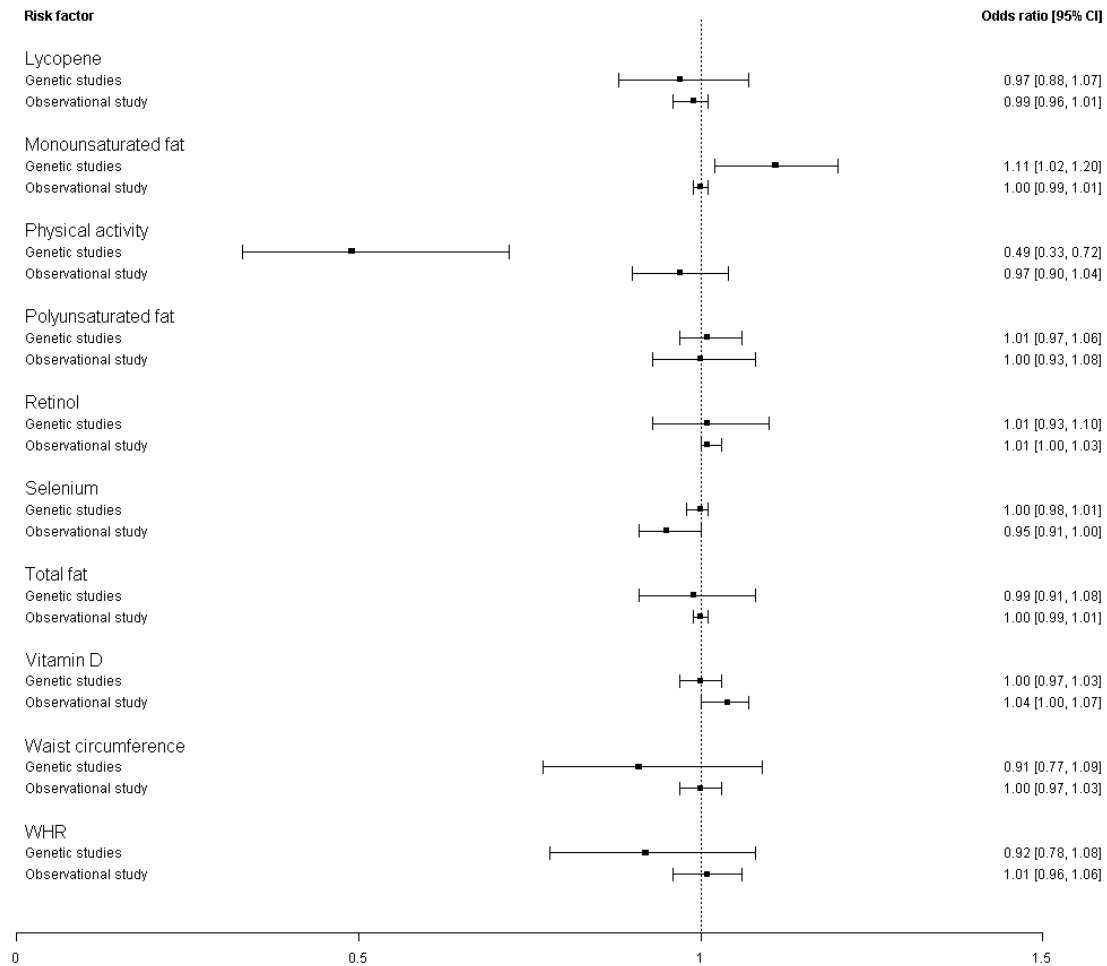

302

303 Only those risk factors are plotted whose observational estimates were reported in WCRF Second or Third Exper  
304 Report<sup>8,39</sup>.

305 The effect estimate for physical activity (Genetic studies) represent average acceleration.

306

307

308

309

**Figure 2. Comparison between observational and MR estimates for the risk factors and aggressive prostate cancer risk**

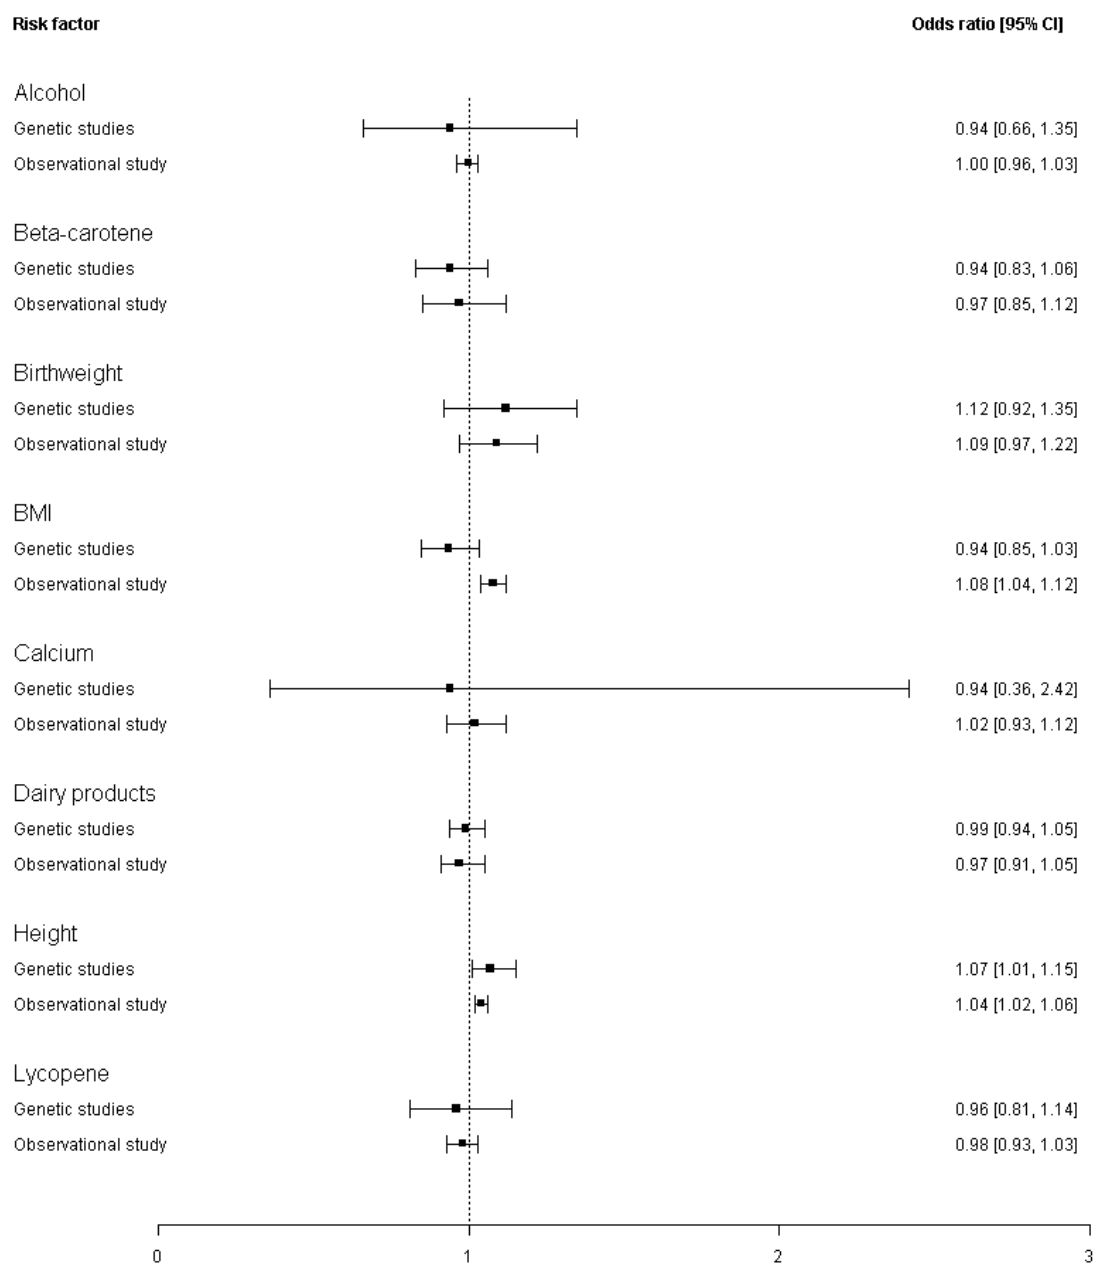

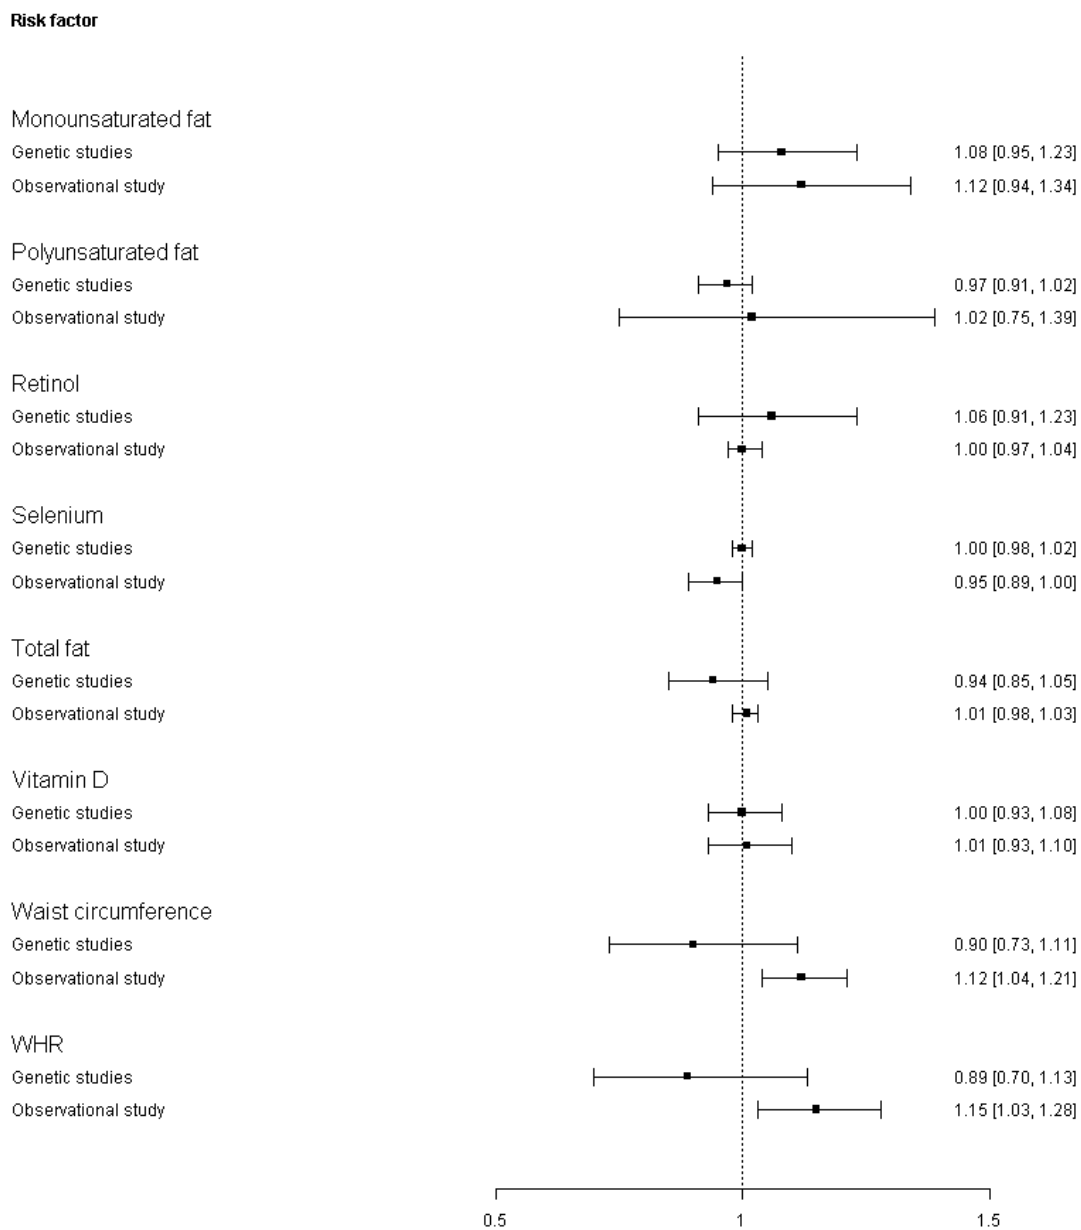

311

312 Only those risk factors are plotted whose observational estimates were reported in WCRF Second or Third  
 313 Exper Report<sup>8,39</sup>.

**Figure 3. Comparison of MR estimates (OR) from the main and replication analyses for the risk factors that showed evidence of association ( $p < 0.05$ ) with overall prostate cancer in PRACTICAL**

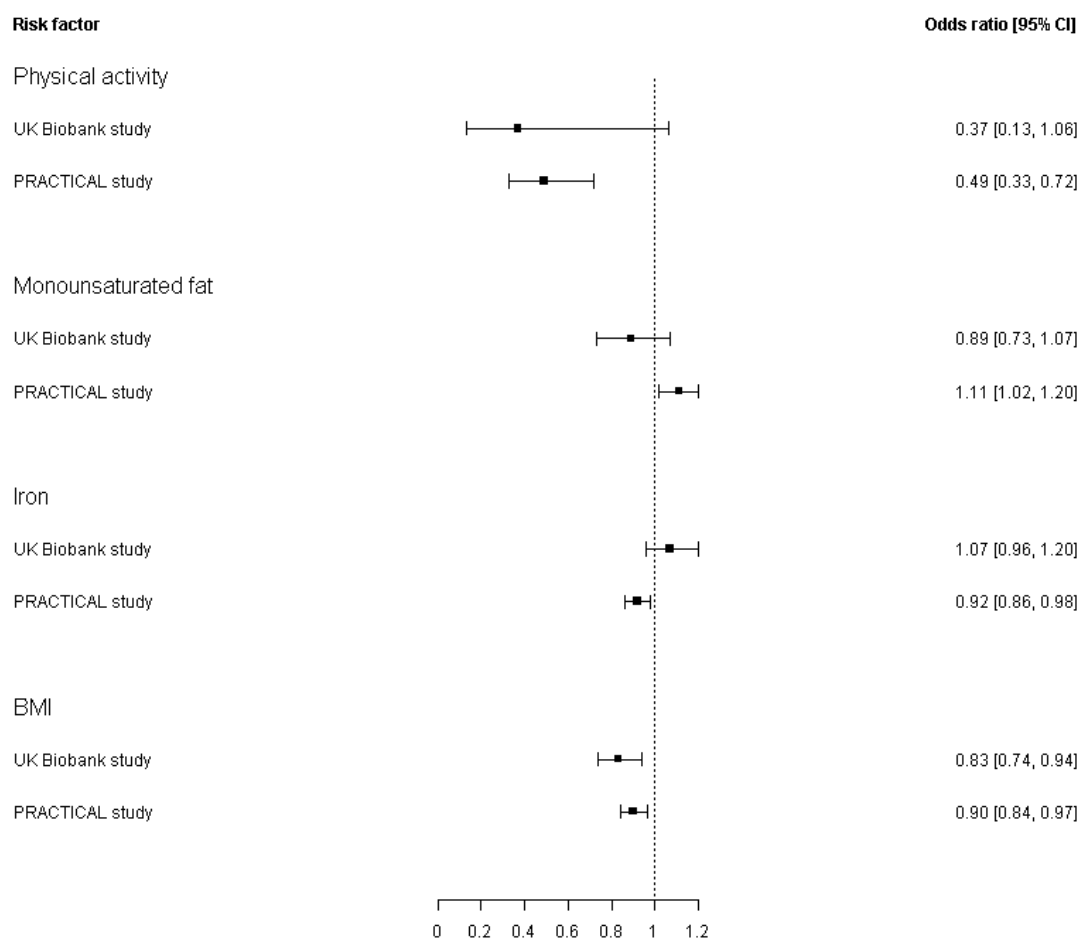

314

315

316

317

318

| Risk factor                                   | PubMed ID | N      | # SNPs <sup>1</sup> | # SNPs <sup>2</sup> | Units                                        | SD   | R <sup>2</sup> | F      | Power <sup>1</sup> | Power <sup>2</sup> |
|-----------------------------------------------|-----------|--------|---------------------|---------------------|----------------------------------------------|------|----------------|--------|--------------------|--------------------|
| <i>Anthropometrics and other measures</i>     |           |        |                     |                     |                                              |      |                |        |                    |                    |
| Birth weight                                  | 27680694  | 143677 | 46                  | 45                  | g                                            | 1    | 1.69           | 53.54  | >99                | 53                 |
| BMI                                           | 30124842  | 681275 | 535                 | 525                 | kg/m <sup>2</sup>                            | 1    | 5.66           | 76.39  | >99                | 96                 |
| Height                                        | 25282103  | 253288 | 433                 | 426                 | m                                            | 1    | 12.01          | 79.71  | >99                | >99                |
| Waist circumference                           | 25673412  | 232101 | 45                  | 44                  | cm                                           | 1    | 0.95           | 49.60  | 94                 | 33                 |
| WHR                                           | 25673412  | 212244 | 31                  | 28                  | ratio                                        | 1    | 0.65           | 44.95  | 83                 | 23                 |
| <i>Circulating macro- and micro-nutrients</i> |           |        |                     |                     |                                              |      |                |        |                    |                    |
| Sugar/Sucrose (glucose)                       | 22885924  | 133010 | 15                  | 15                  | mmol/l                                       | 0.73 | 0.52           | 46.65  | 74                 | 21                 |
| Monounsaturated fat                           | 27005778  | 13535  | 5                   | 5                   | mmol/l                                       | 1    | 2.01           | 55.62  | >99                | 61                 |
| Polyunsaturated fat                           | 27005778  | 13549  | 19                  | 19                  | mmol/l                                       | 1    | 13.79          | 113.93 | >99                | >99                |
| Total fat                                     | 27005778  | 13505  | 12                  | 12                  | mmol/l                                       | 1    | 4.62           | 54.51  | >99                | 92                 |
| Alpha-carotene                                | 28002826  | 433    | 3                   | 3                   | μmol/l                                       | 0.23 | 22.08          | 40.53  | >99                | >99                |
| Beta-carotene                                 | 19185284  | 3932   | 1                   | 1                   | μmol/l                                       | 0.67 | 2.63           | 106.36 | >99                | 73                 |
| Calcium                                       | 24068962  | 61079  | 5                   | 5                   | mg/dl                                        | 1    | 0.65           | 79.85  | 83                 | 25                 |
| Iron                                          | 25352340  | 72958  | 5                   | 5                   | μmol/l                                       | 1    | 2.20           | 328.85 | >99                | 66                 |
| Lycopene                                      | 26861389  | 441    | 1                   | 1                   | N/A                                          | N/A  | 8.34           | 39.93  | >99                | >99                |
| Phosphorous                                   | 20558539  | 16264  | 4                   | 4                   | mg/dl                                        | 0.49 | 1.52           | 62.82  | 99                 | 50                 |
| Retinol                                       | 21878437  | 5006   | 2                   | 2                   | μg/l                                         | 0.22 | 1.37           | 34.79  | 99                 | 46                 |
| Selenium                                      | 25343990  | 9639   | 2                   | 2                   | μg/L                                         | 0.18 | 1.44           | 70.33  | >99                | 48                 |
| Vitamin D                                     | 23393431  | 42024  | 4                   | 4                   | ng/ml                                        | 10   | 2.35           | 253.15 | >99                | 68                 |
| <i>Consumption of foods and drinks</i>        |           |        |                     |                     |                                              |      |                |        |                    |                    |
| Alcohol                                       | 30643251  | 941280 | 77                  | 76                  | drinks per week                              | 1    | 0.56           | 68.35  | 77                 | 22                 |
| Coffee                                        | 25288136  | 91462  | 4                   | 4                   | cups/day                                     | 1.96 | 0.45           | 103.79 | 68                 | 19                 |
| Dairy products (milk intake)                  | 29071499  | 74241  | 1                   | 1                   | glasses/week                                 | 1.7  | 0.52           | 388.87 | 74                 | 21                 |
| <i>Physical-activity</i>                      |           |        |                     |                     |                                              |      |                |        |                    |                    |
| Average acceleration                          | 29899525  | 91084  | 2                   | 2                   | milli gravities (mg)                         | 8.14 | 0.10           | 44.68  | 20                 | 7                  |
| Sedentary behaviour                           | 30531941  | 91105  | 2                   | 2                   | proportion units                             | 1    | 0.08           | 34.91  | 17                 | 6                  |
| Fraction accelerations                        | 29899525  | 90667  | 1                   | 1                   | inverse-normalized fraction of accelerations | 1    | 0.04           | 39.06  | 11                 | 5                  |
| Sleep duration                                | 30531941  | 91105  | 7                   | 7                   | proportion units                             | 1    | 0.38           | 49.29  | 60                 | 16                 |

319 **Table 1. Details of the instruments used to proxy risk factors for prostate cancer risk**

320 BMI = body mass; WHR = waist-hip ratio; N is the sample size for the GWAS used to define the instruments; #  
321 SNPs represents the number of SNPs used within the instrument for each risk factor after clumping,  
322 harmonization and extraction of data from a GWAS of prostate cancer (# SNPs<sup>1</sup> for overall prostate cancer risk  
323 and # SNPs<sup>2</sup> for aggressive prostate cancer risk); Units and SD represent the analysis scale and standard  
324 deviation scale for betas and SE of SNPs for each risk factor(1 = the GWAS results were already on SD scale  
325 otherwise the SD of population mean), respectively; R<sup>2</sup> represents the variance explained in the risk factor by  
326 the instrument; F indicates strength of the instrument used for each risk factor (a strong instrument is sometimes  
327 defined as an F-statistic >10); Power<sup>1</sup> represents the power to detect an odds ratio of 1.2 for an association of  
328 the risk factor with overall prostate cancer at a significance level (P) of 0.05; Power<sup>2</sup> represents the power to  
329 detect an odds ratio of 1.2 for an association of the risk factor with aggressive prostate cancer at a significance  
330 level (P) of 0.05.



331

## 332 **References**

- 333 1. Stewart B, Wild CP. International Agency for Research on Cancer, World Cancer Report 2014,  
334 ed. *International Agency for Research on Cancer* 2014.
- 335 2. Ferlay J, Soerjomataram I, Dikshit R, et al. Cancer incidence and mortality worldwide:  
336 sources, methods and major patterns in GLOBOCAN 2012. *International journal of cancer* 2015;  
337 **136**(5): E359-86.
- 338 3. Center MM, Jemal A, Lortet-Tieulent J, et al. International variation in prostate cancer  
339 incidence and mortality rates. *European urology* 2012; **61**(6): 1079-92.
- 340 4. Wong MC, Goggins WB, Wang HH, et al. Global Incidence and Mortality for Prostate Cancer:  
341 Analysis of Temporal Patterns and Trends in 36 Countries. *European urology* 2016; **70**(5): 862-74.
- 342 5. Haenszel W, Kurihara M. Studies of Japanese migrants. I. Mortality from cancer and other  
343 diseases among Japanese in the United States. *Journal of the National Cancer Institute* 1968; **40**(1):  
344 43-68.
- 345 6. McCredie M, Williams S, Coates M. Cancer mortality in East and Southeast Asian migrants to  
346 New South Wales, Australia, 1975-1995. *British journal of cancer* 1999; **79**(7-8): 1277-82.
- 347 7. Gann PH. Risk factors for prostate cancer. *Reviews in urology* 2002; **4 Suppl 5**: S3-s10.
- 348 8. **Diet, nutrition, physical activity and prostate cancer.** *World Cancer Research fund/American*  
349 *Institute For Cancer Research Continuous Update Project Expert Report 2018.*
- 350 9. Lawlor DA, Davey Smith G, Kundu D, Bruckdorfer KR, Ebrahim S. Those confounded vitamins:  
351 what can we learn from the differences between observational versus randomised trial evidence?  
352 *Lancet (London, England)* 2004; **363**(9422): 1724-7.
- 353 10. Davey Smith G, Ebrahim S. Epidemiology--is it time to call it a day? *International journal of*  
354 *epidemiology* 2001; **30**(1): 1-11.
- 355 11. Angrist JD, Imbens GW, Rubin DB. Identification of Causal Effects Using Instrumental  
356 Variables. *Journal of the American Statistical Association* 1996; **91**(434): 444-55.
- 357 12. Davey Smith G ES. "Mendelian randomisation": can genetic epidemiology contribute to  
358 understanding environmental determinants of disease? . *Int J Epidemiology* 2003; **32**: 1-22.
- 359 13. Davey Smith G HG. Mendelian randomization: genetic anchors for causal inference in  
360 epidemiology studies. *Hum Mol Genet* 2014.
- 361 14. Lawlor DA HR, Sterne JAC, Timpson NJ, Davey Smith G. Mendelian randomization: using  
362 genes as instruments for making causal inferences in epidemiology. *Stat Med* 2008; **27**: 1133-63.
- 363 15. Haycock PC, Burgess S, Wade KH, Bowden J, Relton C, Davey Smith G. Best (but oft-  
364 forgotten) practices: the design, analysis, and interpretation of Mendelian randomization studies.  
365 *The American Journal of Clinical Nutrition* 2016.
- 366 16. Bowden J, Davey Smith G, Haycock PC, Burgess S. Consistent Estimation in Mendelian  
367 Randomization with Some Invalid Instruments Using a Weighted Median Estimator. *Genetic*  
368 *epidemiology* 2016; **40**(4): 304-14.
- 369 17. Timpson NJ, Wade KH, Smith GD. Mendelian randomization: application to cardiovascular  
370 disease. *Current hypertension reports* 2012; **14**(1): 29-37.
- 371 18. Pierce BL, Burgess S. Efficient Design for Mendelian Randomization Studies: Subsample and  
372 2-Sample Instrumental Variable Estimators. *American Journal of Epidemiology* 2013; **178**(7): 1177-  
373 84.

- 374 19. Yarmolinsky J, Wade KH, Richmond RC, et al. Causal Inference in Cancer Epidemiology: What  
375 Is the Role of Mendelian Randomization? *Cancer epidemiology, biomarkers & prevention : a*  
376 *publication of the American Association for Cancer Research, cosponsored by the American Society of*  
377 *Preventive Oncology* 2018; **27**(9): 995-1010.
- 378 20. Hemani G, Zheng J, Elsworth B, et al. The MR-Base platform supports systematic causal  
379 inference across the human phenome. *eLife* 2018; **7**.
- 380 21. Schumacher FR, Al Olama AA, Berndt SI, et al. Association analyses of more than 140,000  
381 men identify 63 new prostate cancer susceptibility loci. *Nature genetics* 2018; **50**(7): 928-36.
- 382 22. Johnson T. Efficient calculation for Multi-SNP genetic risk scores. *American Society of Human*  
383 *Genetics Annual Meeting* 2012.
- 384 23. Bowden J, Davey Smith G, Haycock PC, Burgess S. Consistent Estimation in Mendelian  
385 Randomization with Some Invalid Instruments Using a Weighted Median Estimator. *Genetic*  
386 *Epidemiology* 2016; **40**(4): 304-14.
- 387 24. Hartwig FP, Davey Smith G, Bowden J. Robust inference in summary data Mendelian  
388 randomization via the zero modal pleiotropy assumption. *International journal of epidemiology*  
389 2017; **46**(6): 1985-98.
- 390 25. Bowden J, Davey Smith G, Burgess S. Mendelian randomization with invalid instruments:  
391 effect estimation and bias detection through Egger regression. *International Journal of Epidemiology*  
392 2015.
- 393 26. Verbanck M, Chen CY, Neale B, Do R. Detection of widespread horizontal pleiotropy in causal  
394 relationships inferred from Mendelian randomization between complex traits and diseases. *Nature*  
395 *genetics* 2018; **50**(5): 693-8.
- 396 27. Sterne JA, Sutton AJ, Ioannidis JP, et al. Recommendations for examining and interpreting  
397 funnel plot asymmetry in meta-analyses of randomised controlled trials. *BMJ (Clinical research ed)*  
398 2011; **343**: d4002.
- 399 28. Bowden J, Del Greco MF, Minelli C, Davey Smith G, Sheehan N, Thompson J. A framework for  
400 the investigation of pleiotropy in two-sample summary data Mendelian randomization. *Statistics in*  
401 *medicine* 2017; **36**(11): 1783-802.
- 402 29. Klimentidis YC, Raichlen DA, Bea J, et al. Genome-wide association study of habitual physical  
403 activity in over 377,000 UK Biobank participants identifies multiple variants including CADM2 and  
404 APOE. *International journal of obesity (2005)* 2018; **42**(6): 1161-76.
- 405 30. Ngo TH, Barnard RJ, Tymchuk CN, Cohen P, Aronson WJ. Effect of diet and exercise on serum  
406 insulin, IGF-I, and IGFBP-1 levels and growth of LNCaP cells in vitro (United States). *Cancer causes &*  
407 *control : CCC* 2002; **13**(10): 929-35.
- 408 31. Friedenreich CM, Thune I. A review of physical activity and prostate cancer risk. *Cancer*  
409 *causes & control : CCC* 2001; **12**(5): 461-75.
- 410 32. Davies NM, Gaunt TR, Lewis SJ, et al. The effects of height and BMI on prostate cancer  
411 incidence and mortality: a Mendelian randomization study in 20,848 cases and 20,214 controls from  
412 the PRACTICAL consortium. *Cancer causes & control : CCC* 2015; **26**(11): 1603-16.
- 413 33. Moller E, Wilson KM, Batista JL, Mucci LA, Balter K, Giovannucci E. Body size across the life  
414 course and prostate cancer in the Health Professionals Follow-up Study. *International journal of*  
415 *cancer* 2016; **138**(4): 853-65.
- 416 34. Schneider G, Kirschner MA, Berkowitz R, Ertel NH. Increased estrogen production in obese  
417 men. *The Journal of clinical endocrinology and metabolism* 1979; **48**(4): 633-8.

- 418 35. Wong YN, Ferraldeschi R, Attard G, de Bono J. Evolution of androgen receptor targeted  
419 therapy for advanced prostate cancer. *Nature reviews Clinical oncology* 2014; **11**(6): 365-76.
- 420 36. Mohler JL, Kantoff PW, Armstrong AJ, et al. Prostate cancer, version 2.2014. *Journal of the*  
421 *National Comprehensive Cancer Network : JNCCN* 2014; **12**(5): 686-718.
- 422 37. Heidenreich A, Bastian PJ, Bellmunt J, et al. EAU guidelines on prostate cancer. Part II:  
423 Treatment of advanced, relapsing, and castration-resistant prostate cancer. *European urology* 2014;  
424 **65**(2): 467-79.
- 425 38. Fowke JH, Motley S, Dai Q, Concepcion R, Barocas DA. Association between biomarkers of  
426 obesity and risk of high-grade prostatic intraepithelial neoplasia and prostate cancer--evidence of  
427 effect modification by prostate size. *Cancer letters* 2013; **328**(2): 345-52.
- 428 39. World Cancer Research Fund/ American Institute of Cancer Research. Food, Nutrition,  
429 Physical Activity, and the Prevention of Cancer: a Global Perspective. Washington DC: AICR, 2007  
430 (Second Expert Report). 2007.
- 431 40. Chua AC, Knuiaman MW, Trinder D, Divitini ML, Olynyk JK. Higher concentrations of serum  
432 iron and transferrin saturation but not serum ferritin are associated with cancer outcomes. *The*  
433 *American journal of clinical nutrition* 2016; **104**(3): 736-42.
- 434 41. Gaur A, Collins H, Wulaningsih W, et al. Iron metabolism and risk of cancer in the Swedish  
435 AMORIS study. *Cancer causes & control : CCC* 2013; **24**(7): 1393-402.
- 436 42. Marchioni DM, de Oliveira MF, Carioca AAF, et al. Plasma fatty acids: Biomarkers of dietary  
437 intake? *Nutrition (Burbank, Los Angeles County, Calif)* 2019; **59**: 77-82.
- 438 43. Barker DJ, Thornburg KL. Placental programming of chronic diseases, cancer and lifespan: a  
439 review. *Placenta* 2013; **34**(10): 841-5.
- 440 44. Rolland-Cachera MF. Rate of growth in early life: a predictor of later health? *Advances in*  
441 *experimental medicine and biology* 2005; **569**: 35-9.
- 442 45. Le Roith D, Bondy C, Yakar S, Liu JL, Butler A. The somatomedin hypothesis: 2001. *Endocrine*  
443 *reviews* 2001; **22**(1): 53-74.
- 444 46. Bowden J, Davey Smith G, Burgess S. Mendelian randomization with invalid instruments:  
445 effect estimation and bias detection through Egger regression. *International journal of epidemiology*  
446 2015; **44**(2): 512-25.
- 447 47. Hemani G, Tilling K, Davey Smith G. Orienting the causal relationship between imprecisely  
448 measured traits using GWAS summary data. *PLoS genetics* 2017; **13**(11): e1007081.
- 449  
450
